# Supplementary material for: Synthetic lethality between VPS4A and VPS4B triggers an inflammatory response in colorectal cancer
Source: PubMed Central journal article supplement (PMC7005644; doi:10.15252/emmm.201910812), 2020-01-13
Supplement: EMMM-12-e10812-s001.pdf [file EMMM-12-e10812-s001.pdf]

# **Synthetic lethality between VPS4A and VPS4B triggers an inflammatory response in colorectal cancer**

**Ewelina Szymańska et al.**

## **APPENDIX FIGURES AND TABLES**

### **Table of contents:**

- **Appendix Figure S1.** Transcriptional alterations after individual or combined knockdown of VPS4 paralogs in HCT116 cells.
- **Appendix Figure S2.** Analyses of caspase activation in dying HCT116 cells upon chemical treatment or RelA depletion.
- **Appendix Figure S3.** Flow cytometry analysis of calreticulin cell surface exposure in VPS4A-depleted HCT116 *VPS4B*<sup>-/-</sup> cells.
- **Appendix Table S1.** List of selected terms after gene set enrichment analysis under conditions of combined silencing of *VPS4A+B*.
- **Appendix Table S2.** List of qRT-PCR primers used in this study.
- **Appendix Table S3.** Exact p-values for data from EV figures 1- 4.

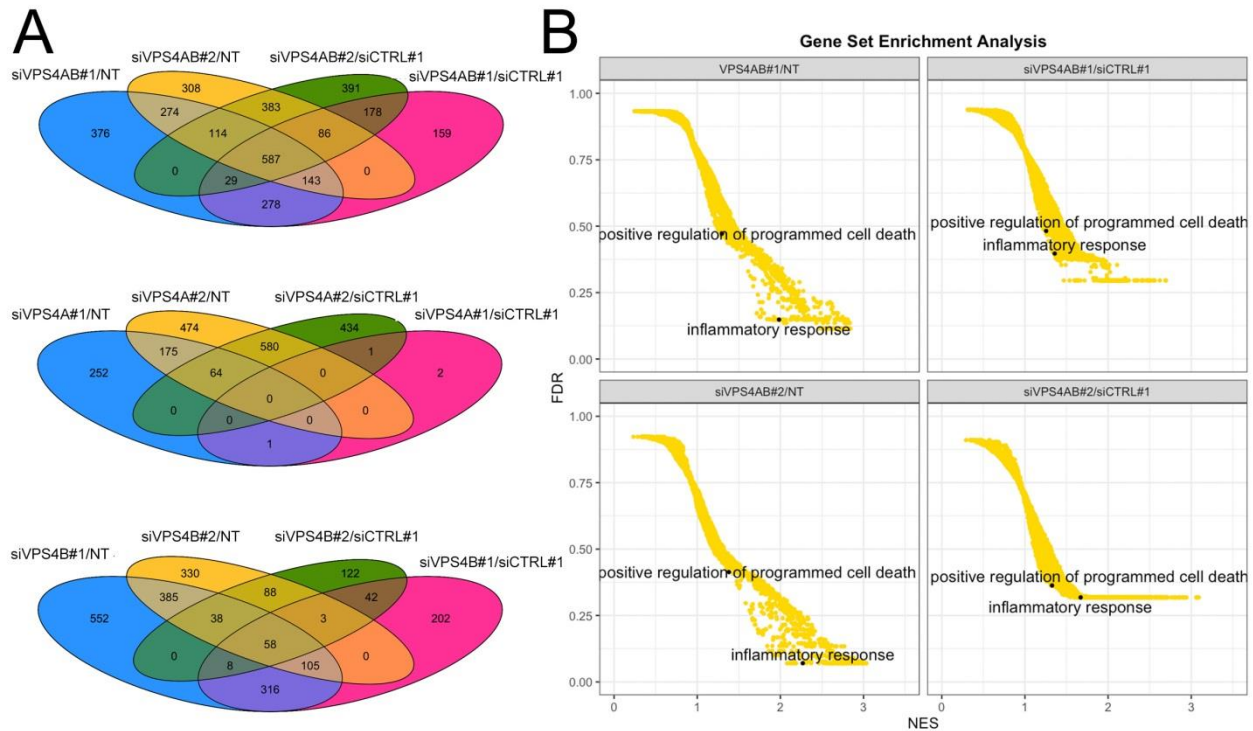

**Appendix Figure S1. Transcriptional alterations after individual or combined knockdown of VPS4 paralogs in HCT116 cells.**

- A** Venn diagrams of transcriptionally upregulated genes ( $\geq 1.5$ -fold; adjusted  $p < 0.05$ ) after individual or combined *VPS4A* and/or *VPS4B* knockdown when normalized to non-transfected (NT) cells and cells transfected with non-targeting siRNA (siCTRL#1), as indicated. Transcriptionally upregulated genes were identified using DESeq2.
- B** Rank order based on Normalized Enrichment Score (NES) and False Discovery Rate (FDR) of enriched gene signatures for four different contrasts of combined *VPS4A+B* silencing and normalization conditions was prepared using the gseGO function from clusterProfiler.

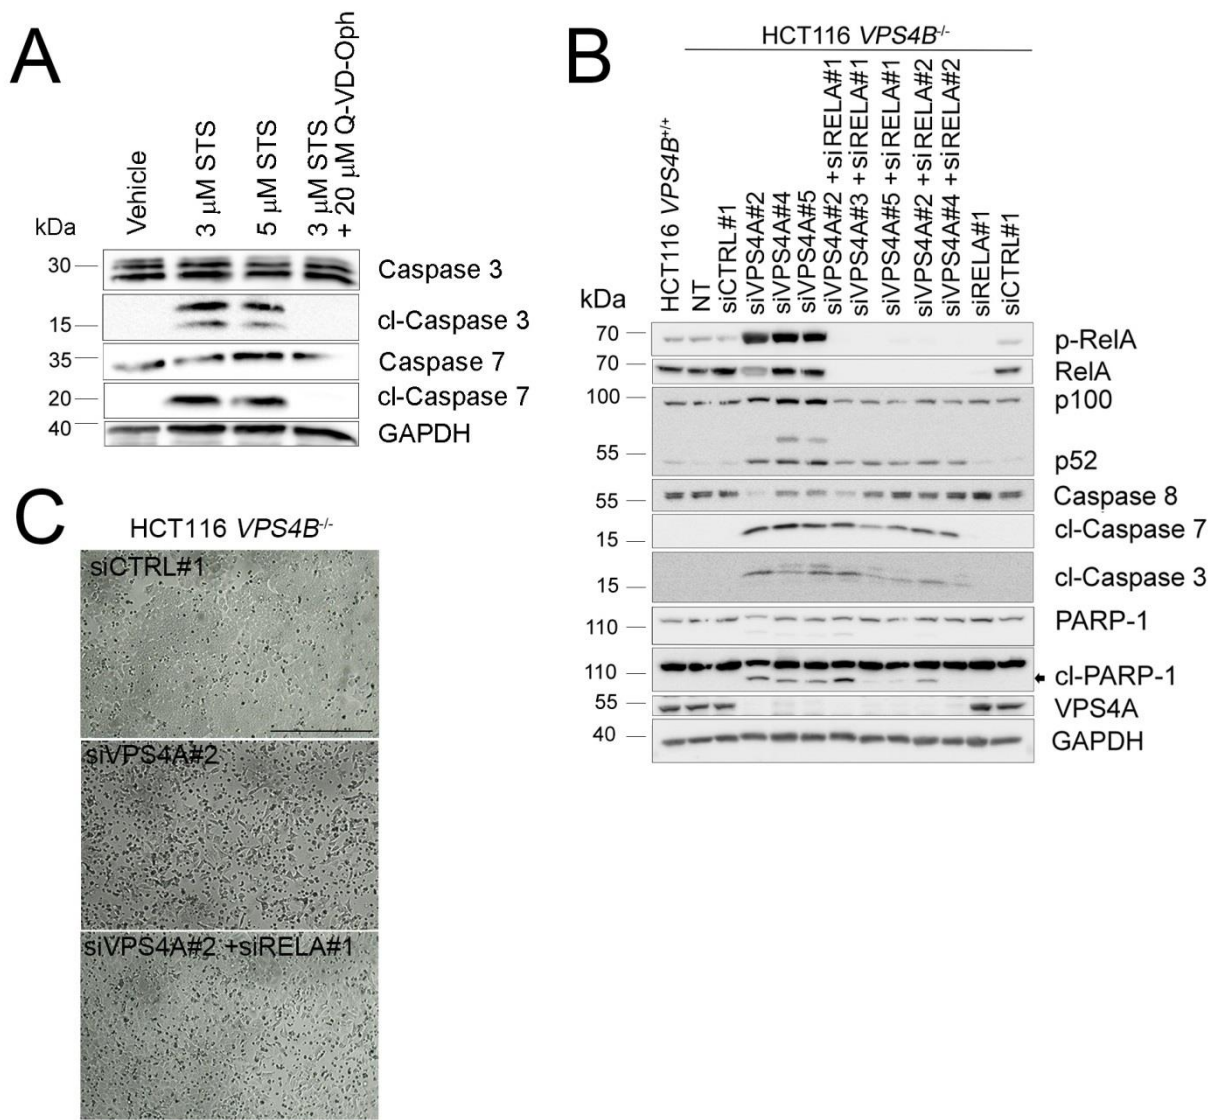

**Appendix Figure S2. Analyses of caspase activation in dying HCT116 cells upon chemical treatment or RelA depletion.**

**A** Immunoblotting analysis of caspase activation in apoptotic HCT116 cells. To induce apoptosis cells were treated for 24 h with staurosporine (STS). To prevent caspase activation, cells were pretreated with Q-VD-Oph 30 min before STS administration and then cultured for 24 h in the presence of STS and Q-VD-Oph. Vehicle – lysates from DMSO-treated cells. cl - cleaved caspases. GAPDH served as a loading control.

- B** Immunoblotting analysis of caspase activation in lysates from cells with depletion of both *VPS4* paralogs (as in Fig 5A) with or without co-depletion of RelA. Two independent siRNA oligonucleotides targeting *RELA* (siRELA#1 or #2) alone or in combination with siVPS4A were used for transfections. Representative blot from 3 experiments is shown. GAPDH served as a loading control. NT- non-transfected; p-RelA - phospho-RelA; cl – cleaved caspases or PARP-1.
- C** Phase contrast microscopy images of HCT116 *VPS4B*<sup>-/-</sup> cells transfected as in (B) acquired 66 h after siRNA transfection. Scale bar, 500  $\mu$ m.

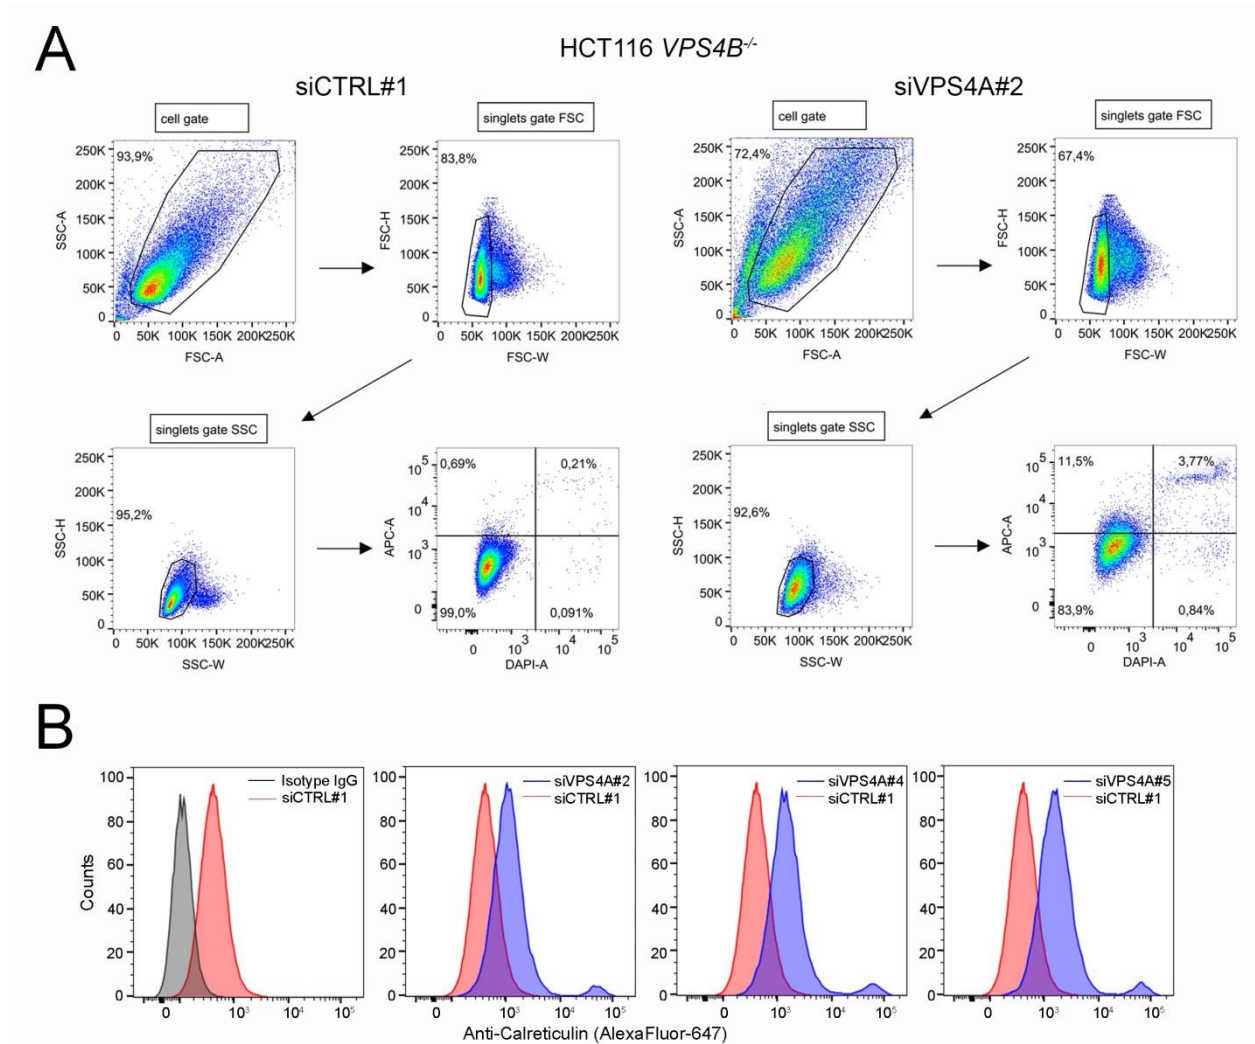

**Appendix Figure S3. Flow cytometry analysis of calreticulin cell surface exposure in *VPS4A*-depleted HCT116 *VPS4B*<sup>-/-</sup> cells.**

**A** Examples of gating strategy for flow cytometric analysis (Fig 6D), applied for siCTRL#1- (left) or siVPS4A#2-transfected (right) HCT116 *VPS4B*<sup>-/-</sup> cells, including cell gate (FSC vs SSC), singlets discrimination gates (FSC-H vs FSC-W, SSC-H vs SSC-W). DAPI staining was used to discriminate live (DAPI-) and dead cells (DAPI+). APC - AlexaFluor-647 fluorescence. This strategy was applied for all flow cytometry experiments.

**B** Overlay histograms showing fluorescence signal of AlexaFluor 647 indicating cell surface calreticulin exposure. One representative experiment from Fig 6D is shown. Grey histogram represents siCTRL#1-transfected cells stained with primary isotype IgG, followed by AlexaFluor 647-conjugated secondary IgG. Red histograms represent siCTRL#1-transfected cells and blue histograms represent cells transfected with siVPS4A (#2, #4, #5) which were stained with anti-calreticulin antibody, followed by AlexaFluor 647-conjugated secondary IgG.

| <b>ID</b>  | <b>Description</b>                           | <b>NES</b> | <b>FDR</b> | <b>Type of contrast</b> |
|------------|----------------------------------------------|------------|------------|-------------------------|
| GO:0006954 | inflammatory response                        | 1.356      | 0.387      | VPS4AB#1/Ctrl           |
| GO:0043068 | positive regulation of programmed cell death | 1.255      | 0.425      | VPS4AB#1/Ctrl           |
| GO:0006954 | inflammatory response                        | 1.669      | 0.320      | VPS4AB#2/Ctrl           |
| GO:0043068 | positive regulation of programmed cell death | 1.319      | 0.395      | VPS4AB#2/Ctrl           |
| GO:0006954 | inflammatory response                        | 1.984      | 0.148      | VPS4AB#1/NT             |
| GO:0043068 | positive regulation of programmed cell death | 1.297      | 0.472      | VPS4AB#1/NT             |
| GO:0006954 | inflammatory response                        | 2.271      | 0.100      | VPS4AB#2/NT             |
| GO:0043068 | positive regulation of programmed cell death | 1.389      | 0.408      | VPS4AB#2/NT             |

**Appendix Table S1. List of selected terms after gene set enrichment analysis under conditions of combined silencing of *VPS4A+B*.**

| Gene name      | Forward primer            | Reverse primer          |
|----------------|---------------------------|-------------------------|
| <i>ACTB</i>    | CAGGTCATCACCATTGGCAAT     | TCTTTGCGGATGTCCACGT     |
| <i>B2M</i>     | GGAGGCTATCCAGCGTACTC      | GAAACCCAGACACATAGCAATTC |
| <i>VPS4A</i>   | CCATCAGGAGGAGGTTTGAA      | CCGAGTAGCCTTCCGTCTTC    |
| <i>VPS4B</i>   | TCGTTAAATATGAAGCACAGGGTGA | TTCTCCTTCCCCATCACTGT    |
| <i>VPS4B-2</i> | GAACTCCGCCATGTCATCC       | TCGTAGTCCCAGCCTTGTC     |
| <i>Nos2</i>    | TCAACTGCAAGAGAACGGAGA     | TCTTTCAGGTCACCTTGGTAGGA |
| <i>Cxcl9</i>   | TCGGACTTCACTCCAACACAG     | AGGGTTCCTCGAACTCCACA    |
| <i>Arg1</i>    | CGTAGACCCTGGGGAACTACTAT   | TCCATCACCTTGCCAATCCC    |
| <i>Ym1</i>     | AGAAGCTCTCCAGAAGCAATCC    | ATCAGCTGGTAGGAAGATCCCAG |
| <i>Il10</i>    | GACTTTAAGGGTTACTTGGGTTGC  | ATTTCTGGGCCATGCTTCTCT   |
| <i>Ccl22</i>   | AGGACTACATCCGTCACCTT      | GACGGTTATCAAAAACAACGCCA |
| <i>Il18</i>    | CGACTTCACTGTACAACCGCA     | TGGGGTTCCTGACTGGCACTTTG |
| <i>Il6</i>     | GATGGATGCTACCAAACCTGG     | TCTGAAGGACTCTGGCTTTG    |
| <i>Rpl19</i>   | AGGCATATGGGCATAGGGAAGAG   | TTGACCTTCAGGTACAGGCTGTG |
| <i>Vps4a</i>   | CAATTGATGGGTGCTGTTGTGA    | GGCCCAAAGAGGAGTATGCC    |
| <i>Vps4b</i>   | AAATGCAAGGAGTTGGTGTGG     | TCTAAACATGGCTGCTCGGG    |

**Appendix Table S2. List of qRT-PCR primers used in this study.**



| Figures | Groups                                                                                                  | Symbol | p-value  | n         | statistic test             | post-test                                      |
|---------|---------------------------------------------------------------------------------------------------------|--------|----------|-----------|----------------------------|------------------------------------------------|
| EV1A    | normal colon vs. adenoma                                                                                | ns     | 0.4259   | 24 vs. 42 | Kruskal-Wallis             | Dunn's test with Benjamini-Hochberg correction |
|         | normal colon vs. adenocarcinoma                                                                         | ns     | 0.0628   | 24 vs. 26 | Kruskal-Wallis             | Dunn's test with Benjamini-Hochberg correction |
|         | adenoma vs. adenocarcinoma                                                                              | ns     | 0.1071   | 42 vs. 26 | Kruskal-Wallis             | Dunn's test with Benjamini-Hochberg correction |
| EV2A    | VPS4A - siCTRL (#1 + #2) group vs. siVPS4B (#1 + #2) group                                              | ns     | 0.5176   | 4         | two-tailed unpaired t-test |                                                |
|         | VPS4B - siCTRL (#1 + #2) group vs. siVPS4A (#1 + #2) group                                              | ns     | 0.3525   | 4         | two-tailed unpaired t-test |                                                |
| EV2B    | VPS4A protein abundance - normalized siCTRL#1 (set as 1) vs. siVPS4B#1                                  | ns     | 0.8750   | 4         | Wilcoxon signed rank test  |                                                |
|         | VPS4A protein abundance - normalized siCTRL#1 (set as 1) vs. siVPS4B#2                                  | ns     | 0.6250   | 4         | Wilcoxon signed rank test  |                                                |
|         | VPS4B protein abundance - normalized siCTRL#1 (set as 1) vs. siVPS4A#1                                  | ns     | 0.2500   | 4         | Wilcoxon signed rank test  |                                                |
|         | VPS4B protein abundance - normalized siCTRL#1 (set as 1) vs. siVPS4A#2                                  | ns     | 0.6250   | 4         | Wilcoxon signed rank test  |                                                |
|         | VPS4B protein abundance - normalized siCTRL#1 (set as 1) vs. siVPS4A#3                                  | ns     | 0.8750   | 4         | Wilcoxon signed rank test  |                                                |
| EV3B    | HCT116 <i>VPS4B</i> <sup>+/+</sup> vs. HCT116 <i>VPS4B</i> <sup>-/-</sup> 1C5                           | ns     | 0.6831   | 5         | one-sample t-test          |                                                |
|         | HCT116 <i>VPS4B</i> <sup>+/+</sup> vs. HCT116 <i>VPS4B</i> <sup>-/-</sup> 2B3                           | ns     | 0.0681   | 5         | one-sample t-test          |                                                |
| EV3D    | siCTRL#1 vs. siVPS4A (#2, #4 and #5) group                                                              | ****   | 8.79E-07 | 4         | one-sample t-test          |                                                |
| EV3F    | HCT116 <i>VPS4B</i> <sup>-/-</sup> Dox- vs. HCT116 <i>VPS4B</i> <sup>-/-</sup> Dox+                     | ns     | 0.4158   | 3         | one-sample t-test          |                                                |
|         | HCT116 <i>VPS4B</i> <sup>-/-</sup> shCTRL#1 Dox- vs. HCT116 <i>VPS4B</i> <sup>-/-</sup> shCTRL#1 Dox+   | ns     | 0.5672   | 3         | two-tailed unpaired t-test |                                                |
|         | HCT116 <i>VPS4B</i> <sup>-/-</sup> shCTRL#2 Dox- vs. HCT116 <i>VPS4B</i> <sup>-/-</sup> shCTRL#2 Dox+   | ns     | 0.4244   | 3         | two-tailed unpaired t-test |                                                |
|         | HCT116 <i>VPS4B</i> <sup>-/-</sup> shVPS4A#1 Dox- vs. HCT116 <i>VPS4B</i> <sup>-/-</sup> shVPS4A#2 Dox+ | **     | 0.0097   | 3         | two-tailed unpaired t-test |                                                |
|         | HCT116 <i>VPS4B</i> <sup>-/-</sup> shVPS4A#2 Dox- vs. HCT116 <i>VPS4B</i> <sup>-/-</sup> shVPS4A#2 Dox+ | *      | 0.0208   | 3         | two-tailed unpaired t-test |                                                |
| EV4A    | EEA1 NT vs. siVPS4A + VPS4B                                                                             | **     | 0.0058   |           | Welch t-test               |                                                |
|         | Rab7 NT vs. siVPS4A + VPS4B                                                                             | **     | 0.0100   |           | Welch t-test               |                                                |
|         | LAMP-1NT vs. siVPS4A + VPS4B                                                                            | *      | 0.0430   |           | the Mann-Whitney U test    |                                                |
| EV4B    | (chart: % of Tf-A647 -positive cells) siCTRL#1 vs. siVPS4A#2 and #5 group                               | **     | 0.0034   | 4         | two-tailed unpaired t-test |                                                |
|         | (chart: intensity of Tf-A647 -positive cells) siCTRL#1 vs. siVPS4A#2 and #5 group                       | ***    | 0.0009   | 4         | two-tailed unpaired t-test |                                                |
| EV4C    | G0/G1 siCTRL#1 vs. siVPS4A#2+siVPS4A5                                                                   | **     | 0.0061   | 4         | the Man -Whitney U test    |                                                |
|         | S siCTRL#1 vs. siVPS4A#2+siVPS4A5                                                                       | ns     | 0.1091   | 4         | the Man -Whitney U test    |                                                |
|         | G2/M siCTRL#1 vs. siVPS4A#2+siVPS4A5                                                                    | **     | 0.0061   | 4         | the Man -Whitney U test    |                                                |

**Appendix Table S3. Exact p-values for data from EV figures 1 - 4.**
